# Supplementary material
Source: HighWire-hosted journal article supplement (https://jitc.bmj.com/content/7/1/264)
Supplement: media-1 [file media-1.pdf]

Genomic data collected from the curated set of non-redundant studies on cBioPortal  
159 studies, 42177 samples

#### Data assembly

- Remove samples without mutations data
- Remove samples not profiled for TET1 mutation
- Assemble duplicate samples for the same patient
- Unify cancer type annotation

Filtered genomic data for alteration frequency analysis  
150 studies, 32568 patients, 39 cancer types
