# Supplementary material
Source: HighWire-hosted journal article supplement (https://jitc.bmj.com/content/7/1/264)
Supplement: media-2 [file media-2.pdf]

TCGA dataset

Somatic mutational data for  
immunogenicity analysis  
10224 patients, 33 cancer types

Matched mutational and  
RNA-seq data  
9497 patients, 33 cancer types

Exclusion:

- Cancer type with no more than five TET1-mutant cases

Neoantigen data for  
immunogenicity analysis  
8442 patients, 32 cancer types

Matched mutational and  
RNA-seq data for anti-tumor immunity  
analysis  
4368 patients, 11 cancer types
