# Supplementary material
Source: HighWire-hosted journal article supplement (https://jitc.bmj.com/content/7/1/264)
Supplement: media-5 [file media-5.pdf]

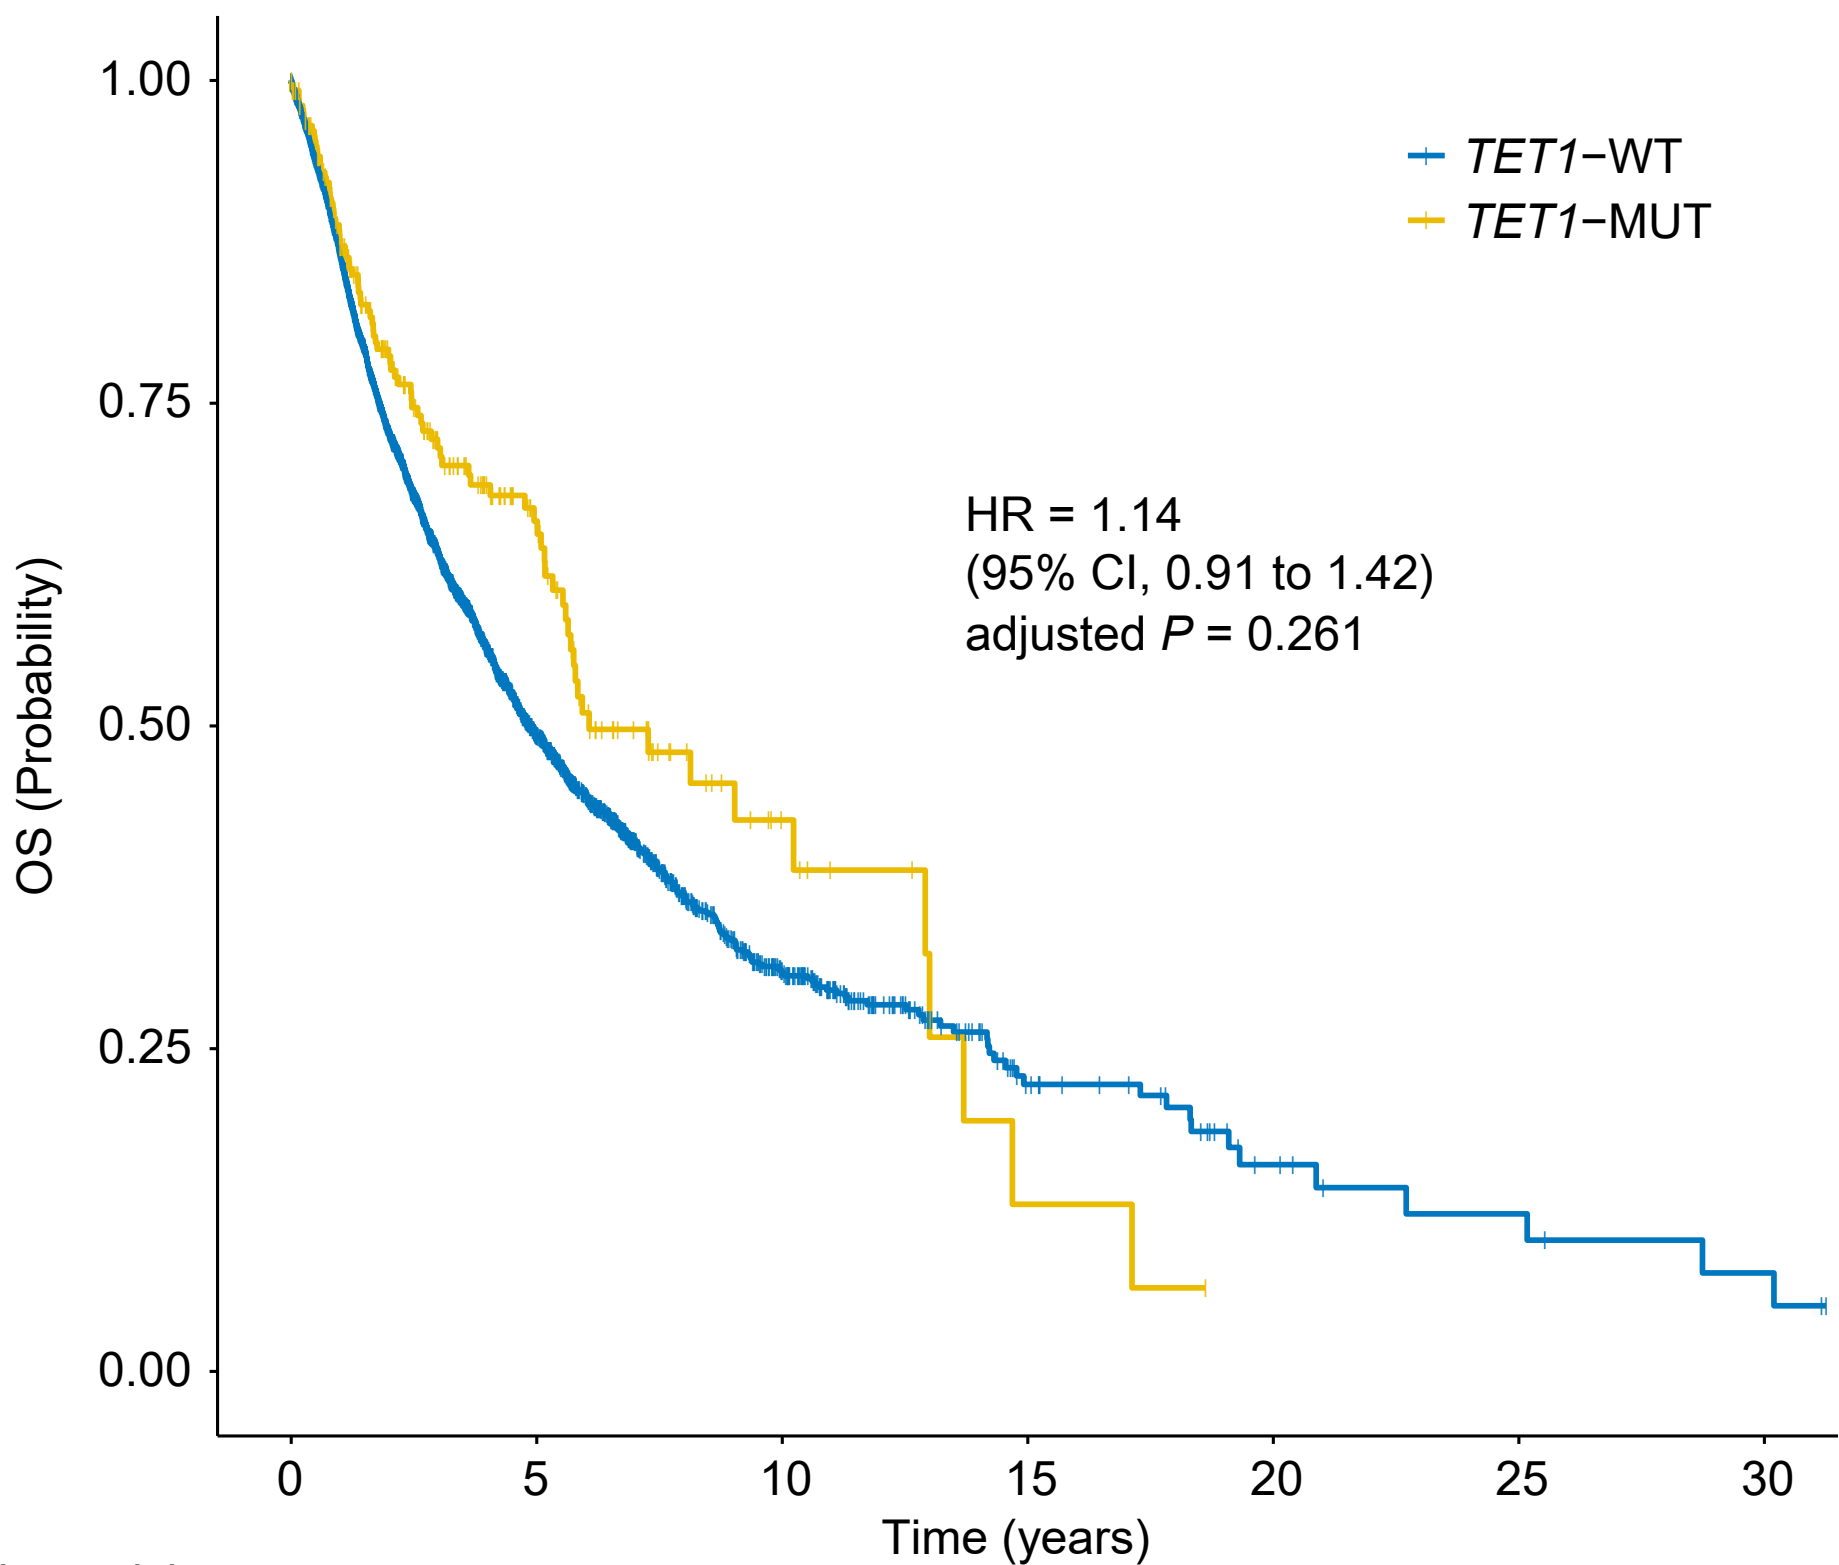

No. at risk

|                  |      |     |     |    |    |   |   |
|------------------|------|-----|-----|----|----|---|---|
| <i>TET1</i> -WT  | 5767 | 834 | 170 | 33 | 11 | 6 | 3 |
| <i>TET1</i> -MUT | 268  | 65  | 11  | 2  | 0  | 0 | 0 |
