# Supplementary material
Source: HighWire-hosted journal article supplement (https://jitc.bmj.com/content/7/1/264)

TET1-MUT TET1-WT

A

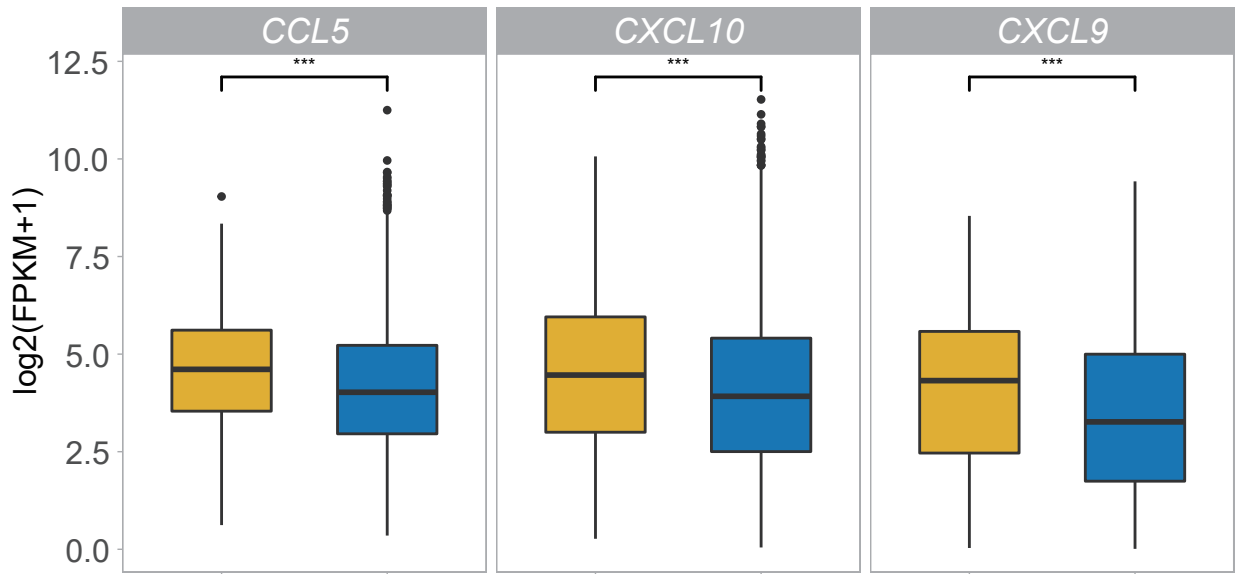

B

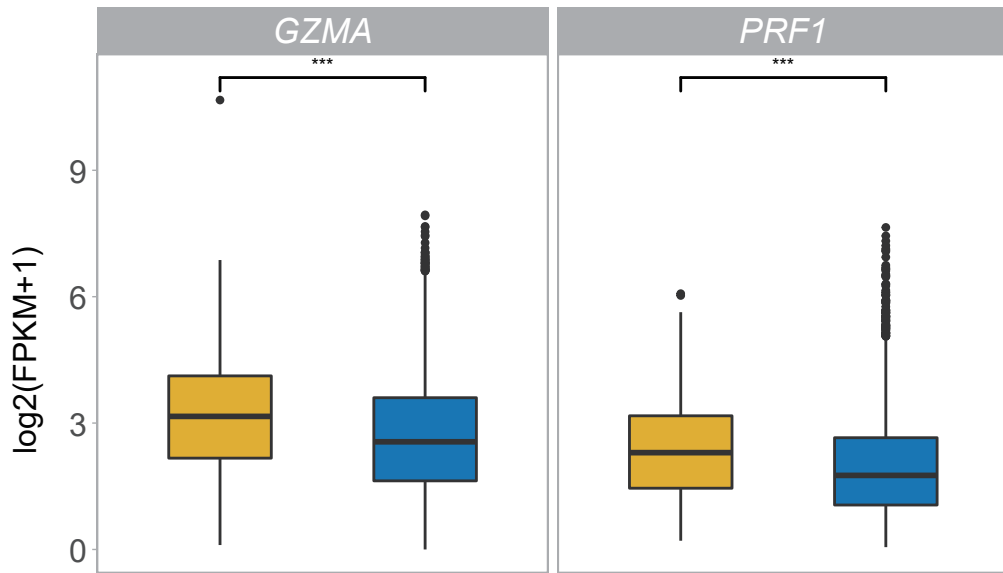

C

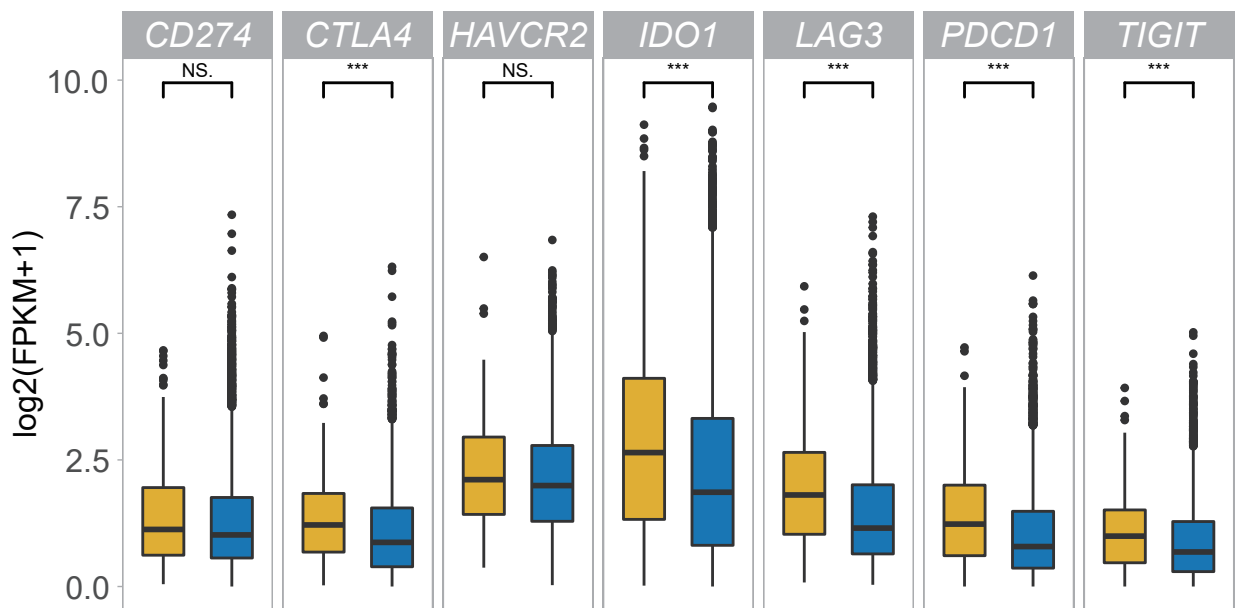

Supplement: media-7 [file media-7.pdf]
